# Supplementary material for: Immune privilege of the CNS is not the consequence of limited antigen sampling
Source: PubMed Central journal article supplement — Sci Rep. 2014 Mar 21;4:4422. doi: 10.1038/srep04422 (PMC3961746; doi:10.1038/srep04422), 2014-03-21
Supplement: srep04422-s1.pdf [file srep04422-s1.pdf]

## SUPPLEMENTAL MATERIAL

### Immune privilege of the CNS is not the consequence of limited antigen sampling

Melissa G. Harris, Paul Hulseberg, Changying Ling, Jozsef Karman, Benjamin D. Clarkson, Mengxue Zhang, Adam Sandor, Kelsey Christensen, Andras Nagy, Matyas Sandor, and Zsuzsanna Fabry

## Supplemental Figure 1

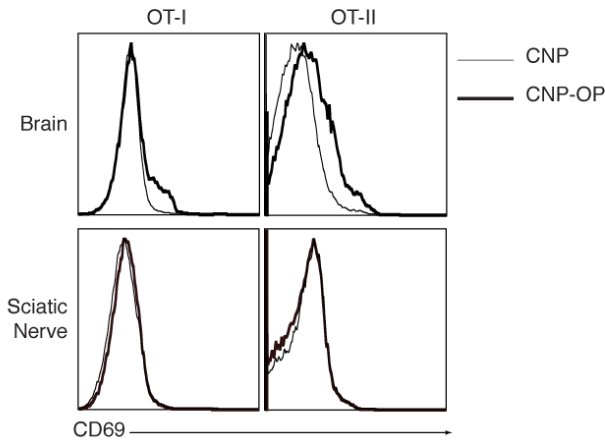

**Supplemental Figure 1.** Histograms show CD69 expression on  $V\alpha 2^+V\beta 5^+$  cells from either a  $CD8^+$  (for OT-I) or  $CD4^+$  (for OT-II) parent gate after overnight stimulation with tissue lysate supernatant from a  $CNP^+$  single transgenic mouse (thin lines) or double transgenic  $CNP-OP$  mouse (thick lines).

## Supplemental Figure 2

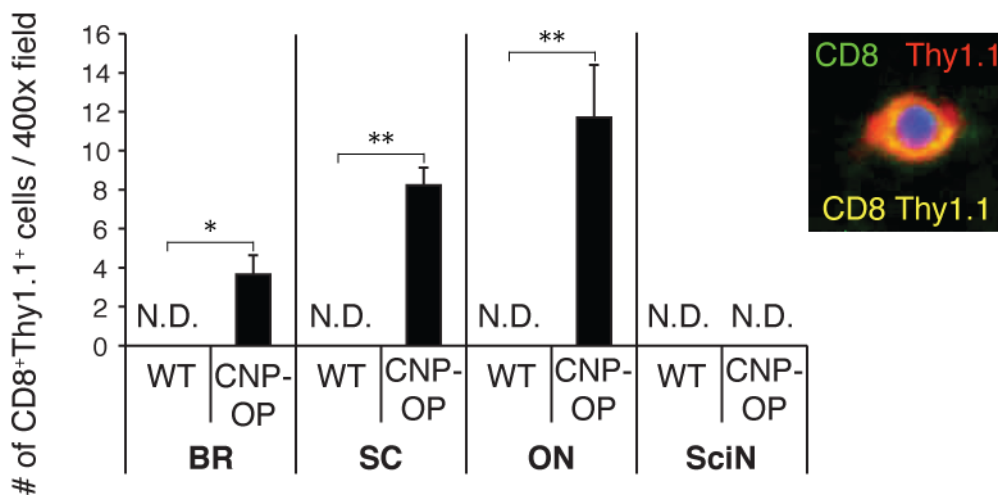

**Supplemental Figure 2.** Staining for CD8 (green) and Thy1.1 (red) was used to identify transferred cells (colocalized/yellow) in frozen tissue sections (representative cell shown on right). Quantification per 400x field; brain (BR), spinal cord (SC), optic nerve (ON); sciatic nerve (SciN). Average of 10 (ON and SciN) to 30 (BR and SC) randomly selected fields. N.D., not detected. \*,  $p < 0.05$ ; \*\*,  $p < 0.001$
